# Supplementary material
Source: PubMed Central journal article supplement (PMC3629801)
Supplement: supp_112.202010_JPET202010Supplemental_Fig._.pdf [file supp_112.202010_JPET202010Supplemental_Fig._.pdf]

# Supplemental Figure 1

**Journal name:** Journal of Pharmacology and Experimental Therapeutics

**Article title:** The UDP-glucuronosyltransferase (UGT) 1A polymorphism c.2042C>G (rs8330) is associated with increased human liver acetaminophen glucuronidation, increased UGT1A exon 5a/5b splice variant mRNA ratio, and decreased risk of unintentional acetaminophen-induced acute liver failure.

**Authors:** Michael H. Court, Marina Freytsis, Xueding Wang, Inga Peter, Chantal Guillemette, Suwagmani Hazarika, Su X. Duan, David J. Greenblatt, William M. Lee and the Acute Liver Failure Study Group.

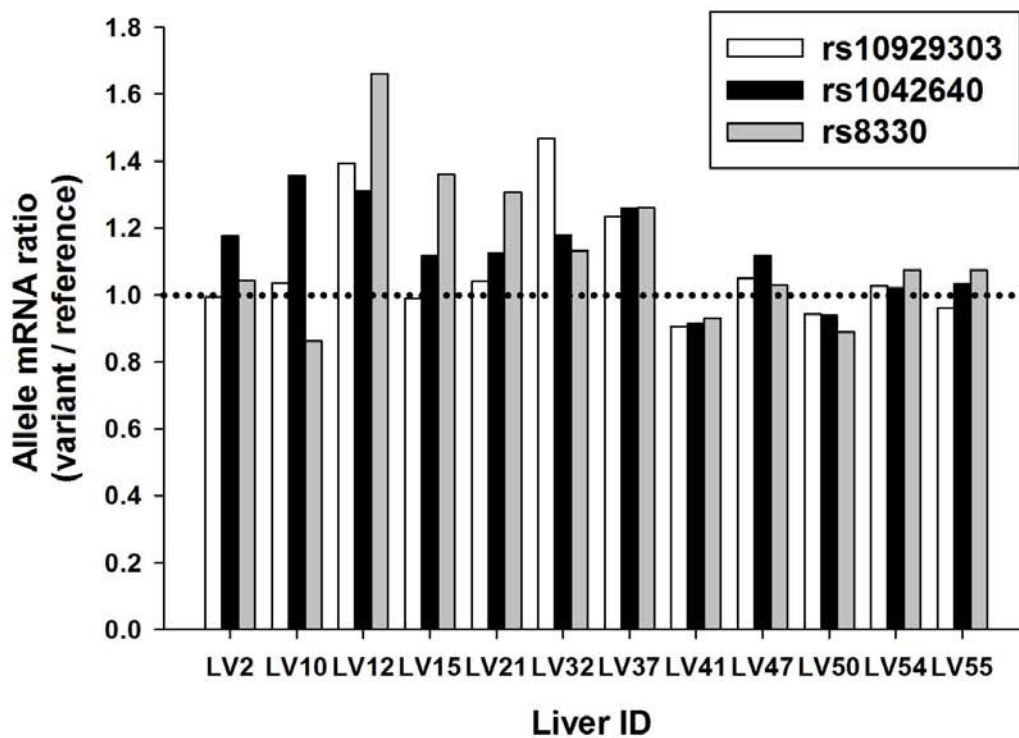

Suppl. Fig. 1. Allelic expression imbalance ratios in 12 human liver samples that were heterozygous for the UGT1A-3'UTR SNPs rs10929303, rs1042640, and rs8330 (reference alleles given in the Methods section). Shown are the ratios of variant to reference allele mRNA levels, normalized to gDNA levels for each of the 12 human liver samples. The dotted line indicates an allelic expression ratio of 1.0 that would be expected if there was no difference in normalized mRNA levels between the alleles.
