# Supplementary material
Source: PubMed Central journal article supplement (PMC3629801)
Supplement: supp_112.202010_jpet_202010_Supplemental_Table_1.pdf [file supp_112.202010_jpet_202010_Supplemental_Table_1.pdf]

Supplemental Table 1. Association of UGT haplotypes with microsomal acetaminophen glucuronidation activity measured at 3 different substrate concentrations in human liver bank samples. Haplotypes evaluated included the UGT1A-3'UTR haplotype with SNPs c.1813C>T, c.1941C>G, and c.2042C>G; and the UGT1A6/UGT1A1 haplotype with variants UGT1A6 c.19T>G, c.541A>G, c.552A>C, and UGT1A1 -53TA6>TA7.

| Haplotype     |                     | Acetaminophen glucuronidation (pmoles / min / mg protein) |      |      |         |                    |     |         |                     |      |         |
|---------------|---------------------|-----------------------------------------------------------|------|------|---------|--------------------|-----|---------|---------------------|------|---------|
|               |                     | 0.1 mM acetaminophen                                      |      |      |         | 2 mM acetaminophen |     |         | 40 mM acetaminophen |      |         |
|               |                     | N                                                         | Mean | SD   | p value | Mean               | SD  | p value | Mean                | SD   | p value |
| UGT1A-3'UTR   | CCC / CCC           | 30                                                        | 12.9 | 11.6 | 0.079   | 718                | 490 | 0.016*  | 2681                | 1294 | 0.038*  |
|               | CCC / TGG           | 11                                                        | 19.9 | 13.3 |         | 1113               | 502 |         | 3787                | 1652 |         |
|               | TGG / TGG           | 2                                                         | 19.1 | 3.6  |         | 1353               | 590 |         | 5040                | 921  |         |
| UGT1A6/UGT1A1 | TAA(TA)6 / TAA(TA)6 | 20                                                        | 16.3 | 10.5 | 0.23    | 1015               | 519 | 0.53    | 3559                | 1653 | 0.69    |
|               | TAA(TA)6 / GGG(TA)7 | 13                                                        | 20.3 | 16.5 |         | 918                | 628 |         | 3234                | 1555 |         |
|               | GGG(TA)7 / GGG(TA)7 | 6                                                         | 10.4 | 3.6  |         | 774                | 455 |         | 2839                | 1292 |         |

\*p<0.05 for ANOVA on log transformed data.
